# Supplementary material for: Selective Capture and Identification of Methicillin-Resistant Staphylococcus aureus by Combining Aptamer-Modified Magnetic Nanoparticles and Mass Spectrometry
Source: MDPI journal article supplement (doi:10.3390/ijms22126571), 2021-06-18
Supplement: s1 [file s1]

## SUPPORTING INFORMATION

Selective capture and identification of methicillin-resistant *Staphylococcus aureus* by combining  
aptamer-modified magnetic nanoparticles and mass spectrometry

1. Yu-Chen Liu,<sup>1</sup> Katragunta Kumar,<sup>1</sup> Cheng-Hsiu Wu,<sup>1</sup> Kai-Chih Chang,<sup>2</sup> Cheng-Kang Chiang<sup>1</sup>  
and Yen-Peng Ho<sup>1\*</sup>

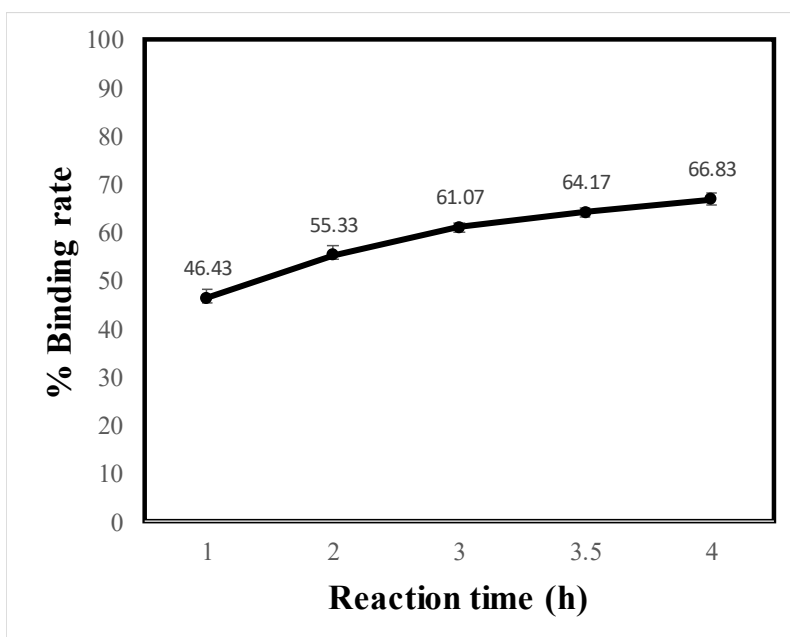

**Figure S1.** The binding rate vs. time of reaction between PAMNPs and aptamers.

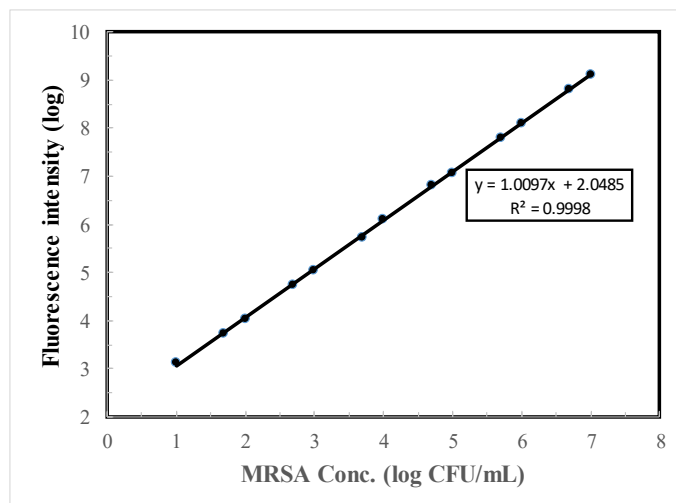

**Figure 2S.** Calibration curve of fluorescence vs. FITC-labeled MRSA concentration.

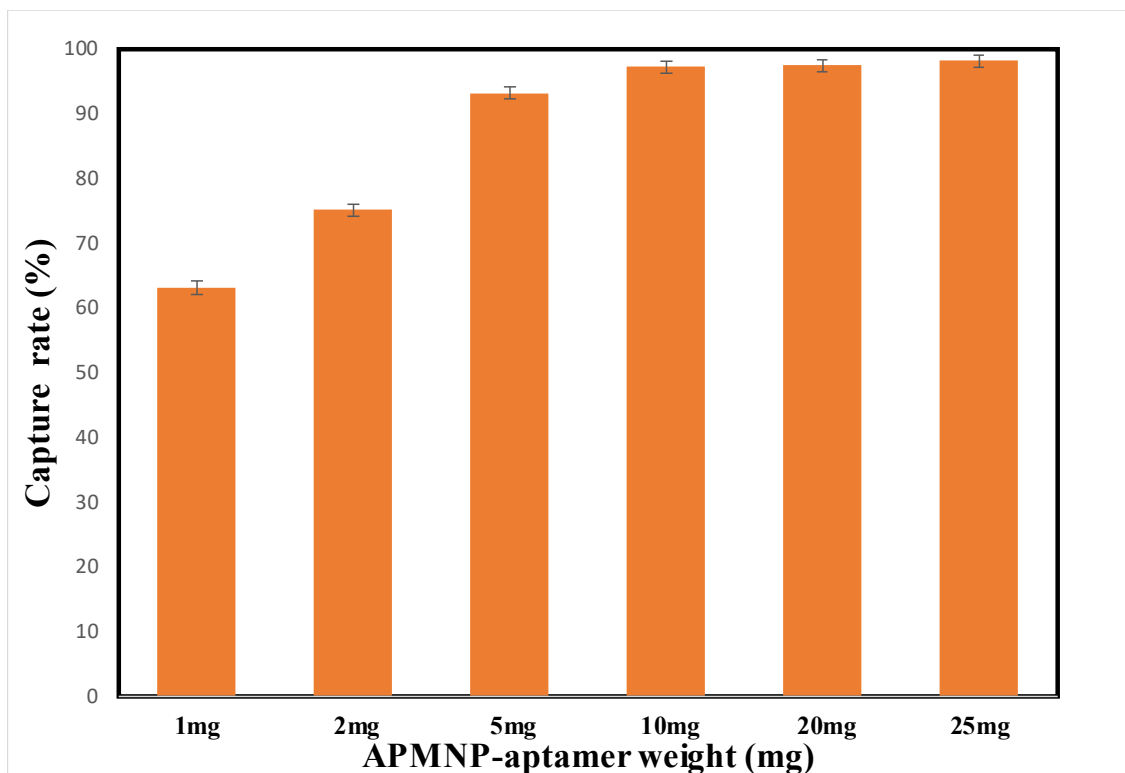

**Figure 3S.** Plot of MRSA capture rate vs. the amount of the modified nanoparticles in 1 mL of PBS (pH 7.5, 37°C) with 1h incubation time.
